# Supplementary material for: Equity Analysis of Repeated Cross-Sectional Survey Data on Mental Health Outcomes in Saskatchewan, Canada during COVID-19 Pandemic
Source: MDPI journal article supplement (doi:10.3390/ijerph192113808), 2022-10-24
Supplement: s1 [file s1]

**Table S1.** Bivariate results of self-reported anxiety for each study cycle.

| Variables                    |                                 | Study cycle 2 (August 2020) |                 |               | Study wave 5 (February 2021) |                 |               | Study cycle 7 (June 2021) |                 |               |
|------------------------------|---------------------------------|-----------------------------|-----------------|---------------|------------------------------|-----------------|---------------|---------------------------|-----------------|---------------|
|                              |                                 | <i>Mild</i>                 | <i>Moderate</i> | <i>Severe</i> | <i>Mild</i>                  | <i>Moderate</i> | <i>Severe</i> | <i>Mild</i>               | <i>Moderate</i> | <i>Severe</i> |
| <b>Current age (years)</b>   |                                 |                             |                 |               |                              |                 |               |                           |                 |               |
|                              | 16 to 29                        | 23 (25.3)                   | 37 (40.7)       | 31 (34.1)     | 29 (28.4)                    | 37 (36.3)       | 36 (35.3)     | 41 (36.9)                 | 37 (33.3)       | 33 (29.7)     |
|                              | 30 to 49                        | 60 (31.4)                   | 81 (42.4)       | 50 (26.2)     | 59 (29.4)                    | 78 (38.8)       | 64 (31.8)     | 74 (34.7)                 | 92 (43.2)       | 47 (22.1)     |
|                              | 50 and above                    | 145 (55.1)                  | 84 (31.9)       | 34 (12.9)     | 132 (52.6)                   | 75 (29.9)       | 44 (17.5)     | 124 (50.2)                | 82 (33.2)       | 41 (16.6)     |
|                              | $\chi^2(df), p$                 | 43.60 (4), <b>&lt;0.001</b> |                 |               | 34.87 (4), <b>&lt;0.001</b>  |                 |               | 17.26 (4), <b>0.002</b>   |                 |               |
| <b>Gender</b>                |                                 |                             |                 |               |                              |                 |               |                           |                 |               |
|                              | Men                             | 119 (45.4)                  | 95 (36.3)       | 48 (18.3)     | 124 (47.0)                   | 89 (33.7)       | 51 (19.3)     | 129 (46.7)                | 95 (34.4)       | 52 (18.8)     |
|                              | Women                           | 108 (38.4)                  | 107 (38.1)      | 66 (23.5)     | 96 (34.0)                    | 100 (35.5)      | 86 (30.5)     | 108 (37.0)                | 115 (39.4)      | 69 (23.6)     |
|                              | $\chi^2(df), p$                 | 3.42 (2), 0.180             |                 |               | 12.56 (2), <b>0.002</b>      |                 |               | 5.70 (2), 0.058           |                 |               |
| <b>Location of residence</b> |                                 |                             |                 |               |                              |                 |               |                           |                 |               |
|                              | Mid-size city/town              | 38 (50.7)                   | 26 (34.7)       | 11 (14.7)     | 33 (37.9)                    | 30 (34.5)       | 24 (27.6)     | 30 (39.0)                 | 32 (41.6)       | 15 (19.5)     |
|                              | Rural                           | 68 (50.0)                   | 43 (31.6)       | 25 (18.4)     | 56 (40.6)                    | 45 (32.6)       | 37 (26.8)     | 85 (50.6)                 | 54 (32.1)       | 29 (17.3)     |
|                              | Regina                          | 55 (30.4)                   | 81 (44.8)       | 45 (24.9)     | 59 (36.9)                    | 56 (35.0)       | 45 (28.1)     | 64 (37.6)                 | 58 (34.1)       | 48 (28.2)     |
|                              | Saskatoon                       | 68 (44.2)                   | 53 (34.4)       | 33 (21.4)     | 72 (42.6)                    | 58 (34.3)       | 39 (23.1)     | 60 (38.7)                 | 66 (42.6)       | 29 (18.7)     |
|                              | $\chi^2(df), p$                 | 16.96 (6), <b>0.009</b>     |                 |               | 1.85 (6), 0.933              |                 |               | 13.24 (6), <b>0.039</b>   |                 |               |
| <b>Household composition</b> |                                 |                             |                 |               |                              |                 |               |                           |                 |               |
|                              | Live alone                      | 53 (41.7)                   | 43 (33.9)       | 31 (24.4)     | 44 (38.3)                    | 35 (30.4)       | 36 (31.3)     | 51 (44.0)                 | 40 (34.5)       | 25 (21.6)     |
|                              | Live with others                | 176 (42.0)                  | 159 (37.9)      | 84 (20.0)     | 176 (40.1)                   | 155 (35.3)      | 108 (24.6)    | 188 (41.3)                | 171 (37.6)      | 96 (21.1)     |
|                              | $\chi^2(df), p$                 | 1.32 (2), 0.516             |                 |               | 2.28 (2), 0.319              |                 |               | 0.40 (2), 0.817           |                 |               |
| <b>Parental status</b>       |                                 |                             |                 |               |                              |                 |               |                           |                 |               |
|                              | Not a parent                    | 153 (46.5)                  | 111 (33.7)      | 65 (19.8)     | 140 (40.5)                   | 107 (30.9)      | 99 (28.6)     | 137 (41.8)                | 115 935.1)      | 76 (23.2)     |
|                              | Has children $\leq$ 17y         | 39 (30.0)                   | 56 (43.1)       | 35 (26.9)     | 48 (37.5)                    | 51 (39.8)       | 29 (22.7)     | 65 (45.5)                 | 55 (38.5)       | 23 (16.1)     |
|                              | Has children $\geq$ 18y         | 29 (42.0)                   | 28 (40.6)       | 12 (17.4)     | 27 (41.5)                    | 24 (36.9)       | 14 (21.5)     | 32 (36.4)                 | 34 (38.6)       | 22 (25.0)     |
|                              | Has children in both age groups | 8 (47.1)                    | 7 (41.2)        | 2 (11.8)      | 5 (35.7)                     | 7 (50.0)        | 2 (14.3)      | 4 (33.3)                  | 7 (58.3)        | 1 (8.3)       |

|                                                                       |                   |               |           |                   |            |            |                   |            |            |
|-----------------------------------------------------------------------|-------------------|---------------|-----------|-------------------|------------|------------|-------------------|------------|------------|
| $\chi^2(df), p$                                                       | 12.24 (6), 0.057  |               |           | 6.45 (6), 0.375   |            |            | 7.11 (6), 0.311   |            |            |
| <b>Employment status</b>                                              |                   |               |           |                   |            |            |                   |            |            |
| Unemployed                                                            | 16 (25.8)         | 27 (43.5)     | 19 (30.6) | 14 (22.6)         | 16 (25.8)  | 32 (51.6)  | 9 (17.6)          | 25 (49.0)  | 17 (33.3)  |
| Retired/Student                                                       | 81 (56.3)         | 44 (30.6)     | 19 (13.2) | 80 (50.3)         | 49 (30.8)  | 30 (18.9)  | 94 (58.8)         | 35 (21.9)  | 31 (19.4)  |
| Employed                                                              | 131 (39.8)        | 128 (38.9)    | 70 (21.3) | 125 (37.8)        | 123 (37.2) | 83 (25.1)  | 134 (38.1)        | 149 (42.3) | 69 (19.6)  |
| $\chi^2(df), p$                                                       | 20.67 (4), <0.001 |               |           | 30.72 (4), <0.001 |            |            | 37.93 (4), <0.001 |            |            |
| <b>Highest level of education</b>                                     |                   |               |           |                   |            |            |                   |            |            |
| Elementary/high school                                                | 66 (43.1)         | 52 (34.0)     | 35 (22.9) | 66 (42.6)         | 43 (27.7)  | 46 (29.7)  | 87 (49.2)         | 52 (29.4)  | 38 (21.5)  |
| College/technical                                                     | 74 (40.7)         | 71 (39.0)     | 37 (20.3) | 62 (35.6)         | 65 (37.4)  | 47 (27.0)  | 62 (37.8)         | 66 (40.2)  | 36 (22.0)  |
| University                                                            | 82 (40.2)         | 80 (39.2)     | 42 (20.6) | 91 (41.7)         | 77 (35.3)  | 50 (22.9)  | 89 (39.2)         | 91 (40.1)  | 47 (20.7)  |
| $\chi^2(df), p$                                                       | 1.27 (4), 0.866   |               |           | 5.38 (4), 0.250   |            |            | 7.18 (4), 0.126   |            |            |
| <b>Income</b>                                                         |                   |               |           |                   |            |            |                   |            |            |
| < \$20K                                                               | 9 (30.0)          | 13 (43.3)     | 8 (26.7)  | 11 (28.2)         | 10 (25.6)  | 18 (46.2)  | 4 (19.0)          | 7 (33.3)   | 10 (47.6)  |
| \$20K to \$49K                                                        | 45 (39.1)         | 40 (34.8)     | 30 (26.1) | 37 (27.4)         | 47 (34.8)  | 51 (37.8)  | 33 (29.5)         | 44 (39.3)  | 35 (31.3)  |
| \$50K to \$99K                                                        | 92 (42.8)         | 83 (38.6)     | 40 (18.6) | 80 (42.8)         | 69 (36.9)  | 38 (20.3)  | 118 (49.4)        | 82 (34.3)  | 39 (16.3)  |
| ≥ \$100K                                                              | 64 (47.8)         | 52 (38.8)     | 18 (13.4) | 77 (50.0)         | 52 (33.8)  | 25 (16.2)  | 64 (41.3)         | 61 (39.4)  | 30 (19.4)  |
| $\chi^2(df), p$                                                       | 8.85 (6), 0.182   |               |           | 33.73 (6), <0.001 |            |            | 25.78 (6), <0.001 |            |            |
| <b>Immigration status</b>                                             |                   |               |           |                   |            |            |                   |            |            |
| Born outside Canada                                                   | 59 (42.1)         | 48 (34.3)     | 33 (23.6) | 53 (39.8)         | 44 (33.1)  | 36 (27.1)  | 56 (42.1)         | 41 (30.8)  | 36 (27.1)  |
| Born in Canada                                                        | 166 (41.8)        | 150 (37.8)    | 81 (20.4) | 165 (41.3)        | 137 (34.3) | 98 (24.5)  | 178 (41.6)        | 167 (39.0) | 83 (19.4)  |
| $\chi^2(df), p$                                                       | 1.41 (4), 0.841   |               |           | 9.74 (4), 0.045   |            |            | 4.97 (4), 0.290   |            |            |
| <b>Ethnicity</b>                                                      |                   |               |           |                   |            |            |                   |            |            |
| Indigenous/ Visible minority (African, Asian, Hispanic/Latino/Others) |                   | Not available |           | 29 (43.9)         | 22 (33.3)  | 15 (22.7)  | 47 (47.0)         | 34 (34.0)  | 19 (19.0)  |
| White                                                                 |                   |               |           | 191 (39.1)        | 168 (34.4) | 130 (26.6) | 192 (40.9)        | 176 (37.4) | 102 (21.7) |
| $\chi^2(df), p$                                                       |                   |               |           | 0.69 (2), 0.705   |            |            | 1.29 (2), 0.524   |            |            |

| Physical disability |                 |  |               |  |                 |            |            |                         |            |            |
|---------------------|-----------------|--|---------------|--|-----------------|------------|------------|-------------------------|------------|------------|
|                     | Yes             |  | Not available |  | 7 (24.1)        | 12 (41.4)  | 10 (34.5)  | 9 (26.5)                | 10 (29.4)  | 15 (44.1)  |
|                     | No              |  |               |  | 212 (40.5)      | 177 (33.8) | 134 (25.6) | 229 (42.8)              | 200 (37.4) | 106 (19.8) |
|                     | $\chi^2(df, p)$ |  |               |  | 3.14 (2), 0.208 |            |            | 11.47 (2), <b>0.003</b> |            |            |

**Table S2.** Bivariate results of self-reported depression for each study cycle.

| Variables                    |                                 | Study cycle 2 (August 2020) |            |           | Study cycle 5 (February 2021) |            |           | Study cycle (June 2021) |            |           |
|------------------------------|---------------------------------|-----------------------------|------------|-----------|-------------------------------|------------|-----------|-------------------------|------------|-----------|
|                              |                                 | Low                         | Moderate   | High      | Low                           | Moderate   | High      | Low                     | Moderate   | High      |
| <b>Current age (years)</b>   |                                 |                             |            |           |                               |            |           |                         |            |           |
|                              | 16 to 29                        | 31 (33.7)                   | 38 (41.3)  | 23 (25.0) | 32 (33.7)                     | 34 (35.8)  | 29 (30.5) | 51 (47.2)               | 35 (32.4)  | 22 (20.4) |
|                              | 30 to 49                        | 89 (47.3)                   | 61 (32.4)  | 38 (20.2) | 91 (45.0)                     | 65 (32.2)  | 46 (22.8) | 103 (49.3)              | 78 (37.3)  | 28 (13.4) |
|                              | 50 and above                    | 183 (69.8)                  | 53 (20.2)  | 26 (9.9)  | 169 (67.3)                    | 53 (21.1)  | 29 (11.6) | 175 (71.1)              | 49 (19.9)  | 22 (8.9)  |
|                              | $\chi^2(df), p$                 | 45.21 (4), <0.001           |            |           | 41.83 (4), <0.001             |            |           | 32.37 (4), <0.001       |            |           |
| <b>Gender</b>                |                                 |                             |            |           |                               |            |           |                         |            |           |
|                              | Men                             | 148 (56.7)                  | 64 (24.5)  | 49 (18.8) | 149 (56.7)                    | 67 (25.5)  | 47 (17.9) | 172 (63.2)              | 69 (25.4)  | 31 (11.4) |
|                              | Women                           | 153 (54.8)                  | 88 (31.5)  | 38 (13.6) | 143 (51.3)                    | 84 (30.1)  | 52 (18.6) | 156 (54.5)              | 91 (31.8)  | 39 (13.6) |
|                              | $\chi^2(df), p$                 | 4.66 (2), 0.097             |            |           | 1.81 (2), 0.403               |            |           | 4.37 (2), 0.112         |            |           |
| <b>Location of residence</b> |                                 |                             |            |           |                               |            |           |                         |            |           |
|                              | Mid-size city/town              | 47 (61.0)                   | 20 (26.0)  | 10 (13.0) | 44 (51.2)                     | 23 (26.7)  | 19 (22.1) | 44 (57.9)               | 24 (31.6)  | 8 (10.5)  |
|                              | Rural                           | 83 (61.5)                   | 31 (23.0)  | 21 (15.6) | 78 (56.1)                     | 37 (26.6)  | 24 (17.3) | 107 (64.8)              | 44 (26.7)  | 14 (8.5)  |
|                              | Regina                          | 88 (50.0)                   | 56 (31.8)  | 32 (18.2) | 74 (46.8)                     | 51 (32.3)  | 33 (20.9) | 100 (59.5)              | 36 (21.4)  | 32 (19.0) |
|                              | Saskatoon                       | 85 (55.2)                   | 45 (29.2)  | 24 (15.6) | 96 (57.8)                     | 42 (25.3)  | 28 (16.9) | 77 (50.7)               | 58 (38.2)  | 17 (11.2) |
|                              | $\chi^2(df), p$                 | 5.54 (6), 0.476             |            |           | 5.12 (6), 0.528               |            |           | 19.22 (6), 0.004        |            |           |
| <b>Household composition</b> |                                 |                             |            |           |                               |            |           |                         |            |           |
|                              | Live alone                      | 69 (53.9)                   | 32 (25.0)  | 27 (21.1) | 53 (45.7)                     | 32 (27.6)  | 31 (26.7) | 61 (53.5)               | 31 (27.2)  | 22 (19.3) |
|                              | Live with others                | 234 (56.5)                  | 120 (29.0) | 60 (14.5) | 240 (55.3)                    | 121 (27.9) | 73 (16.8) | 267 (59.7)              | 131 (29.3) | 49 (11.0) |
|                              | $\chi^2(df), p$                 | 3.32 (2), 0.189             |            |           | 6.33 (2), 0.042               |            |           | 5.73 (2), 0.057         |            |           |
| <b>Parental status</b>       |                                 |                             |            |           |                               |            |           |                         |            |           |
|                              | Not a parent                    | 186 (57.1)                  | 89 (27.3)  | 51 (15.6) | 170 (50.1)                    | 95 (28.0)  | 74 (21.8) | 180 (55.9)              | 95 (29.5)  | 47 (14.6) |
|                              | Has children ≤ 17y              | 62 (47.7)                   | 43 (33.1)  | 25 (19.2) | 70 (54.7)                     | 38 (29.7)  | 20 (15.6) | 88 (63.3)               | 38 (27.3)  | 13 (9.4)  |
|                              | Has children ≥ 18y              | 42 (60.0)                   | 17 (24.3)  | 11 (15.7) | 42 (61.8)                     | 19 (27.9)  | 7 (10.3)  | 55 (61.8)               | 24 (27.0)  | 10 (11.2) |
|                              | Has children in both age groups | 14 (77.8)                   | 3 (16.7)   | 1 (5.6)   | 9 (64.3)                      | 2 (14.3)   | 3 (21.4)  | 6 (50.0)                | 5 (41.7)   | 1 (8.3)   |



|  |                 |  |                  |  |                 |            |           |                 |            |           |
|--|-----------------|--|------------------|--|-----------------|------------|-----------|-----------------|------------|-----------|
|  | Yes             |  | Not<br>available |  | 12 (40.0)       | 8 (26.7)   | 10 (33.3) | 17 (48.6)       | 15 (42.9)  | 3 (8.6)   |
|  | No              |  |                  |  | 280 (54.1)      | 145 (28.0) | 93 (18.0) | 311 (59.1)      | 147 (27.9) | 68 (12.9) |
|  | $\chi^2(df), p$ |  |                  |  | 4.63 (2), 0.098 |            |           | 3.64 (2), 0.162 |            |           |

**Table S3.** Bivariate results of accessing mental health support and services for each study cycle.

| Variables                    |                         | Study cycle 2 (August 2020)        |                             |                                        | Study cycle 5 (February 2021)      |                             |                                        | Study cycle 7 (June 2021)          |                             |                                        |
|------------------------------|-------------------------|------------------------------------|-----------------------------|----------------------------------------|------------------------------------|-----------------------------|----------------------------------------|------------------------------------|-----------------------------|----------------------------------------|
|                              |                         | <i>Needed support and received</i> | <i>Needed but no access</i> | <i>Did not need and did not access</i> | <i>Needed support and received</i> | <i>Needed but no access</i> | <i>Did not need and did not access</i> | <i>Needed support and received</i> | <i>Needed but no access</i> | <i>Did not need and did not access</i> |
| <b>Current age (years)</b>   |                         |                                    |                             |                                        |                                    |                             |                                        |                                    |                             |                                        |
|                              | 16 to 29                | 31 (33.0)                          | 16 (17.0)                   | 47 (50.0)                              | 44 (44.0)                          | 12 (12.0)                   | 44 (44.0)                              | 33 (28.7)                          | 18 (15.7)                   | 64 (55.7)                              |
|                              | 30 to 49                | 52 (27.1)                          | 22 (11.5)                   | 118 (61.5)                             | 65 (31.7)                          | 27 (13.2)                   | 113 (55.1)                             | 57 (26.5)                          | 29 (13.5)                   | 129 (60.0)                             |
|                              | 50 and above            | 21 (8.0)                           | 20 (7.6)                    | 222 (84.4)                             | 25 (9.8)                           | 25 (9.8)                    | 206 (80.5)                             | 24 (9.6)                           | 23 (9.2)                    | 204 (81.3)                             |
|                              | $\chi^2(df), p$         | 54.24 (4), <0.001                  |                             |                                        | 64.11 (4), <0.001                  |                             |                                        | 37.36 (4), <0.001                  |                             |                                        |
| <b>Gender</b>                |                         |                                    |                             |                                        |                                    |                             |                                        |                                    |                             |                                        |
|                              | Men                     | 57 (21.6)                          | 20 (7.6)                    | 187 (70.8)                             | 55 (20.6)                          | 25 (9.4)                    | 187 (70.0)                             | 42 (14.9)                          | 23 (8.2)                    | 217 (77.0)                             |
|                              | Women                   | 46 (16.4)                          | 36 (12.8)                   | 199 (70.8)                             | 73 (25.5)                          | 37 (12.9)                   | 176 (61.5)                             | 69 (23.5)                          | 46 (15.6)                   | 179 (60.9)                             |
|                              | $\chi^2(df), p$         | 5.59 (2), 0.061                    |                             |                                        | 4.54 (2), 0.103                    |                             |                                        | 17.63 (2), <0.001                  |                             |                                        |
| <b>Location of residence</b> |                         |                                    |                             |                                        |                                    |                             |                                        |                                    |                             |                                        |
|                              | Mid-size city/town      | 10 (13.2)                          | 10 (13.2)                   | 56 (73.7)                              | 22 (25.6)                          | 8 (9.3)                     | 56 (65.1)                              | 11 (14.5)                          | 14 (18.4)                   | 51 (67.1)                              |
|                              | Rural                   | 21 (15.3)                          | 14 (10.2)                   | 102 (74.5)                             | 25 (17.7)                          | 15 (10.6)                   | 101 (71.6)                             | 25 (14.6)                          | 18 (10.5)                   | 128 (74.9)                             |
|                              | Regina                  | 43 (23.6)                          | 20 (11.0)                   | 119 (65.4)                             | 46 (28.6)                          | 20 (12.4)                   | 95 (59.0)                              | 38 (22.2)                          | 16 (9.4)                    | 117 (68.4)                             |
|                              | Saskatoon               | 28 (18.4)                          | 14 (9.2)                    | 110 (72.4)                             | 40 (23.4)                          | 20 (11.7)                   | 111 (64.9)                             | 40 (24.7)                          | 21 (13.0)                   | 101 (62.3)                             |
|                              | $\chi^2(df), p$         | 6.40 (6), 0.379                    |                             |                                        | 6.25 (6), 0.395                    |                             |                                        | 11.90 (6), 0.064                   |                             |                                        |
| <b>Household composition</b> |                         |                                    |                             |                                        |                                    |                             |                                        |                                    |                             |                                        |
|                              | Live alone              | 31 (24.0)                          | 15 (11.6)                   | 83 (64.3)                              | 40 (34.5)                          | 9 (7.8)                     | 67 (57.8)                              | 27 (22.7)                          | 16 (13.4)                   | 76 (63.9)                              |
|                              | Live with others        | 72 (17.2)                          | 42 (10.0)                   | 304 (72.7)                             | 94 (21.1)                          | 55 (12.4)                   | 296 (66.5)                             | 86 (18.7)                          | 54 (11.7)                   | 321 (69.6)                             |
|                              | $\chi^2(df), p$         | 3.64 (2), 0.162                    |                             |                                        | 9.67 (2), 0.008                    |                             |                                        | 1.48 (2), 0.476                    |                             |                                        |
| <b>Parental status</b>       |                         |                                    |                             |                                        |                                    |                             |                                        |                                    |                             |                                        |
|                              | Not a parent            | 55 (16.5)                          | 37 (11.1)                   | 240 (72.3)                             | 85 (24.4)                          | 36 (10.3)                   | 227 (65.2)                             | 67 (19.8)                          | 46 (13.6)                   | 225 (66.6)                             |
|                              | Has children $\leq$ 17y | 38 (29.7)                          | 15 (11.7)                   | 75 (58.6)                              | 35 (26.7)                          | 18 (13.7)                   | 78 (59.5)                              | 23 (16.2)                          | 16 (11.3)                   | 103 (72.5)                             |

|                                   |                                        |                             |               |            |                             |           |            |                             |           |            |
|-----------------------------------|----------------------------------------|-----------------------------|---------------|------------|-----------------------------|-----------|------------|-----------------------------|-----------|------------|
|                                   | Has children ≥ 18y                     | 6 (8.8)                     | 4 (5.9)       | 58 (85.3)  | 12 (17.1)                   | 8 (11.4)  | 50 (71.4)  | 20 (23.0)                   | 6 (6.9)   | 61 (70.1)  |
|                                   | Has children in both age groups        | 3 (16.7)                    | 2 (11.1)      | 13 (72.2)  | 3 (21.4)                    | 2 (14.3)  | 9 (64.3)   | 3 (25.0)                    | 1 (8.3)   | 8 (66.7)   |
|                                   | $\chi^2(df), p$                        | 19.17 (6), <b>0.004</b>     |               |            | 3.96 (6), 0.682             |           |            | 4.93 (6), 0.553             |           |            |
| <b>Employment status</b>          |                                        |                             |               |            |                             |           |            |                             |           |            |
|                                   | Unemployed                             | 15 (24.6)                   | 10 (16.4)     | 36 (59.0)  | 24 (39.3)                   | 11 (18.0) | 26 (42.6)  | 9 (18.4)                    | 12 (24.5) | 28 (57.1)  |
|                                   | Retired/Student                        | 9 (6.1)                     | 7 (4.7)       | 132 (89.2) | 20 (12.2)                   | 16 (9.8)  | 128 (78.0) | 24 (14.2)                   | 16 (9.5)  | 129 (76.3) |
|                                   | Employed                               | 74 (22.6)                   | 38 (11.6)     | 215 (65.7) | 90 (27.0)                   | 37 (11.1) | 206 (61.9) | 78 (22.1)                   | 38 (10.8) | 237 (67.1) |
|                                   | $\chi^2(df), p$                        | 33.32 (4), <b>&lt;0.001</b> |               |            | 29.06 (4), <b>&lt;0.001</b> |           |            | 14.10 (4), <b>0.007</b>     |           |            |
| <b>Highest level of education</b> |                                        |                             |               |            |                             |           |            |                             |           |            |
|                                   | Elementary/high school                 | 16 (10.1)                   | 16 (10.1)     | 127 (79.9) | 38 (23.0)                   | 22 (13.3) | 105 (63.6) | 30 (16.6)                   | 26 (14.4) | 125 (69.1) |
|                                   | College/technical                      | 38 (21.3)                   | 15 (8.4)      | 125 (70.2) | 42 (24.7)                   | 23 (13.5) | 105 (61.8) | 28 (16.6)                   | 21 (12.4) | 120 (71.0) |
|                                   | University                             | 49 (23.9)                   | 26 (12.7)     | 130 (63.4) | 54 (24.3)                   | 20 (9.0)  | 148 (66.7) | 56 (24.9)                   | 22 (9.8)  | 147 (65.3) |
|                                   | $\chi^2(df), p$                        | 14.92 (4), <b>0.005</b>     |               |            | 2.72 (4), 0.605             |           |            | 7.06 (4), 0.133             |           |            |
| <b>Income</b>                     |                                        |                             |               |            |                             |           |            |                             |           |            |
|                                   | < \$20K                                | 9 (26.5)                    | 7 (20.6)      | 18 (52.9)  | 20 (51.3)                   | 5 (12.8)  | 14 (35.9)  | 6 (30.0)                    | 8 (40.0)  | 6 (30.0)   |
|                                   | \$20K to \$49K                         | 25 (21.4)                   | 13 (11.1)     | 79 (67.5)  | 43 (31.4)                   | 20 (14.6) | 74 (54.0)  | 20 (17.2)                   | 20 (17.2) | 76 (65.6)  |
|                                   | \$50K to \$99K                         | 42 (19.4)                   | 22 (10.2)     | 152 (70.4) | 40 (21.4)                   | 18 (9.6)  | 129 (69.0) | 54 (21.7)                   | 16 (6.4)  | 179 (71.9) |
|                                   | ≥ \$100K                               | 20 (14.8)                   | 11 (8.1)      | 104 (77.0) | 26 (16.6)                   | 15 (9.6)  | 116 (73.9) | 26 (16.8)                   | 18 (11.6) | 111 (71.6) |
|                                   | $\chi^2(df), p$                        | 9.09 (6), 0.168             |               |            | 30.96 (6), <b>&lt;0.001</b> |           |            | 30.75 (6), <b>&lt;0.001</b> |           |            |
| <b>Immigration status</b>         |                                        |                             |               |            |                             |           |            |                             |           |            |
|                                   | Born outside Canada                    | 32 (22.9)                   | 8 (5.7)       | 100 (71.4) | 28 (20.9)                   | 5 (3.7)   | 101 (75.4) | 25 (18.5)                   | 11 (8.1)  | 99 (73.3)  |
|                                   | Born inside Canada                     | 71 (17.6)                   | 48 (11.9)     | 284 (70.5) | 98 (24.1)                   | 53 (13.0) | 256 (62.9) | 88 (20.1)                   | 59 (13.5) | 291 (66.4) |
|                                   | $\chi^2(df), p$                        | 6.94 (4), 0.139             |               |            | 24.64 (4), <b>&lt;0.001</b> |           |            | 6.06 (4), 0.194             |           |            |
| <b>Ethnicity</b>                  |                                        |                             |               |            |                             |           |            |                             |           |            |
|                                   | Indigenous/ Visible minority (African, |                             | Not available |            | 20 (30.8)                   | 6 (9.2)   | 39 (60.0)  | 25 (24.5)                   | 14 (13.7) | 63 (61.8)  |



|                                   |  |                  |  |                 |           |            |                 |           |            |
|-----------------------------------|--|------------------|--|-----------------|-----------|------------|-----------------|-----------|------------|
| Asian,<br>Hispanic/Latino/Others) |  |                  |  |                 |           |            |                 |           |            |
| White                             |  |                  |  | 114 (23.0)      | 58 (11.7) | 324 (65.3) | 88 (18.4)       | 56 (11.7) | 334 (69.9) |
| $\chi^2(df), p$                   |  |                  |  | 2.01 (2), 0.365 |           |            | 2.69 (2), 0.260 |           |            |
| <b>Physical disability</b>        |  |                  |  |                 |           |            |                 |           |            |
| Yes                               |  | Not<br>available |  | 8 (25.0)        | 6 (18.8)  | 18 (56.3)  | 8 (21.6)        | 5 (13.5)  | 24 (64.9)  |
| No                                |  |                  |  | 126 (23.9)      | 58 (11.0) | 344 (65.2) | 106 (19.5)      | 64 (11.8) | 373 (68.7) |
| $\chi^2(df), p$                   |  |                  |  | 1.97 (2), 0.372 |           |            | 0.23 (2), 0.887 |           |            |

**Table S4.** Full regression model for factors associated with moderate, and severe anxiety compared to mild anxiety.

|                          | <b>Moderate anxiety</b> |                | <b>Severe anxiety</b> |                |
|--------------------------|-------------------------|----------------|-----------------------|----------------|
|                          | RRR (95% CI)            | <i>p-value</i> | RRR (95% CI)          | <i>p-value</i> |
| <b>Age (years)</b>       |                         |                |                       |                |
| 16 – 29                  | 1.47 (0.60 – 3.57)      | 0.388          | 1.97 (0.69 – 5.61)    | 0.200          |
| 30 – 49                  | 2.67 (1.41 – 5.05)      | <b>0.002</b>   | 3.47 (1.62 – 7.44)    | <b>0.001</b>   |
| Above 50                 | Ref.                    |                | Ref.                  |                |
| <b>Gender</b>            |                         |                |                       |                |
| Women                    | 1.73 (1.01 – 2.94)      | <b>0.043</b>   | 2.31 (1.21 – 4.39)    | <b>0.010</b>   |
| Men                      | Ref.                    |                | Ref.                  |                |
| <b>Employment status</b> |                         |                |                       |                |
| Unemployed               | 0.99 (0.38 – 2.56)      | 0.989          | 2.10 (0.79 – 5.59)    | 0.136          |

|                                          |                      |              |                     |              |
|------------------------------------------|----------------------|--------------|---------------------|--------------|
| Retired/ Student                         | 0.74 (0.38 – 1.44)   | 0.380        | 0.67 (0.28 – 1.56)  | 0.360        |
| Employed                                 | Ref.                 |              | Ref.                |              |
| <b>Income</b>                            |                      |              |                     |              |
| < \$20K                                  | 0.40 (0.11 – 1.46)   | 0.168        | 2.44 (0.78 – 7.63)  | 0.122        |
| \$20K to \$49K                           | 1.73 (0.83 – 3.62)   | 0.142        | 3.81 (1.52 – 9.50)  | <b>0.004</b> |
| \$50K to \$99K                           | 1.26 (0.68 – 2.35)   | 0.451        | 1.24 (0.53 – 2.85)  | 0.611        |
| ≥ \$100K                                 | Ref.                 |              | Ref.                |              |
| <b>Educational status</b>                |                      |              |                     |              |
| Elementary/high                          | 0.47 (0.24 – 0.93)   | <b>0.032</b> | 1.01 (0.45 – 2.25)  | 0.977        |
| College/technical                        | 1.10 (0.61 – 1.99)   | 0.729        | 1.83 (0.85 – 3.93)  | 0.116        |
| University                               | Ref.                 |              | Ref.                |              |
| <b>Physical disability</b>               |                      |              |                     |              |
| Yes                                      | 2.06 (0.70 – 6.05)   | 0.188        | 1.44 (0.46 – 4.49)  | 0.525        |
| No                                       | Ref.                 |              | Ref.                |              |
| <b>Immigration status</b>                |                      |              |                     |              |
| Born outside Canada                      | 5.24 (0.21 – 130.87) | 0.313        | 3.83 (0.14 – 99.83) | 0.419        |
| Born inside Canada                       | Ref.                 |              | Ref.                |              |
| <b>Age × Immigration status</b>          |                      |              |                     |              |
| 16 – 29 × born outside Canada            | 3.02 (0.28 – 31.70)  | 0.357        | 2.99 (0.35 – 25.68) | 0.316        |
| 30 – 49 × born outside Canada            | 1.06 (0.18 – 6.16)   | 0.940        | 0.45 (0.11 – 1.88)  | 0.279        |
| <b>Gender × immigration status</b>       |                      |              |                     |              |
| Women × born outside                     | 0.64 (0.21 – 1.89)   | 0.420        | 0.42 (0.12 – 1.46)  | 0.175        |
| <b>Employment × immigration status</b>   |                      |              |                     |              |
| Unemployed × born outside Canada         | 0.57 (0.08 – 4.05)   | 0.582        | 0.40 (0.05 – 2.80)  | 0.361        |
| Retired/student × born outside<br>Canada | 2.18 (0.41 – 11.57)  | 0.357        | 0.51 (0.08 – 3.26)  | 0.484        |
| <b>Income × immigration status</b>       |                      |              |                     |              |

|                                         |                       |              |                     |              |
|-----------------------------------------|-----------------------|--------------|---------------------|--------------|
| <\$20K × born outside Canada            | 29.24 (1.42 – 601.41) | <b>0.029</b> | 2.34 (0.09 – 56.48) | 0.600        |
| \$20K to \$49 × born outside Canada     | 3.17 (0.55 – 18.03)   | 0.192        | 0.73 (0.10 – 5.04)  | 0.753        |
| \$50K to \$99K × born outside Canada    | 1.78 (0.37 – 8.45)    | 0.467        | 0.97 (0.18 – 5.16)  | 0.979        |
| <b>Education × immigration status</b>   |                       |              |                     |              |
| Elementary/high × born outside Canada   | 2.06 (0.47 – 9.04)    | 0.337        | 1.36 (0.29 – 6.21)  | 0.687        |
| College/technical × born outside Canada | 0.78 (0.22 – 2.81)    | 0.712        | 0.19 (0.03 – 0.95)  | <b>0.044</b> |

**Table S5.** Full regression model for factors associated with moderate, and severe depression compared to mild depression.

|                                | Moderate depression |                | Severe depression   |                  |
|--------------------------------|---------------------|----------------|---------------------|------------------|
|                                | RRR (95% CI)        | <i>p-value</i> | RRR (95% CI)        | <i>p-value</i>   |
| <b>Age (years)</b>             |                     |                |                     |                  |
| 16 – 29                        | 3.69 (1.48 – 9.20)  | <b>0.005</b>   | 4.38 (1.31 – 14.66) | <b>0.016</b>     |
| 30 – 49                        | 3.79 (1.78 – 8.09)  | <b>0.001</b>   | 6.79 (2.72 – 16.89) | <b>&lt;0.001</b> |
| Above 50                       | Ref.                |                | Ref.                |                  |
| <b>Household composition</b>   |                     |                |                     |                  |
| Live alone                     | 0.86 (0.43 – 1.70)  | 0.673          | 1.26 (0.57 – 2.80)  | 0.557            |
| Live with others               | Ref.                |                | Ref.                |                  |
| <b>Parental status</b>         |                     |                |                     |                  |
| No children                    | 3.16 (0.62 – 16.04) | 0.165          | 0.84 (0.19 – 3.56)  | 0.818            |
| Has children ≤17yrs            | 1.36 (0.26 – 7.03)  | 0.707          | 0.29 (0.06 – 1.29)  | 0.106            |
| Has children ≥18yrs            | 3.90 (0.69 – 22.05) | 0.123          | 0.93 (0.16 – 5.20)  | 0.938            |
| Has children in both age group | Ref.                |                | Ref.                |                  |
| <b>Employment status</b>       |                     |                |                     |                  |
| Unemployed                     | 0.76 (0.34 – 1.70)  | 0.516          | 1.07 (0.46 – 2.50)  | 0.860            |
| Retired/ Student               | 0.67 (0.34 – 1.31)  | 0.247          | 0.38 (0.15 – 0.96)  | <b>0.041</b>     |
| Employed                       | Ref.                |                | Ref.                |                  |
| <b>Income</b>                  |                     |                |                     |                  |
| < \$20K                        | 1.51 (0.40 – 5.60)  | 0.538          | 7.09 (1.75 – 28.72) | <b>0.006</b>     |
| \$20K to \$49K                 | 3.20 (1.47 – 6.97)  | <b>0.003</b>   | 9.82 (3.24 – 29.71) | <b>&lt;0.001</b> |
| \$50K to \$99K                 | 1.68 (0.87 – 3.24)  | 0.121          | 3.31 (1.28 – 8.54)  | <b>0.013</b>     |
| ≥ \$100K                       | Ref.                |                | Ref.                |                  |
| <b>Educational status</b>      |                     |                |                     |                  |
| Elementary/high                | 0.75 (0.37 – 1.53)  | 0.441          | 4.04 (0.63 – 25.72) | 0.138            |

|                                         |                      |              |                        |              |
|-----------------------------------------|----------------------|--------------|------------------------|--------------|
| College/technical                       | 1.39 (0.76 – 2.54)   | 0.278        | 0.78 (0.12 – 4.86)     | 0.795        |
| University                              | Ref.                 |              | Ref.                   |              |
| <b>Physical disability</b>              |                      |              |                        |              |
| Yes                                     | 1.28 (0.43 – 3.80)   | 0.646        | 2.21 (0.63 – 7.73)     | 0.212        |
| No                                      | Ref.                 |              | Ref.                   |              |
| <b>Immigration status</b>               |                      |              |                        |              |
| Born outside Canada                     | 3.09 (0.11 – 84.83)  | 0.504        | 0.95 (0.01 – 57.92)    | 0.982        |
| Born inside Canada                      | Ref.                 |              | Ref.                   |              |
| <b>Ethnicity</b>                        |                      |              |                        |              |
| Visible minority                        | 0.75 (0.14 – 3.94)   | 0.737        | 3.59 (0.91 – 14.16)    | 0.068        |
| White                                   | Ref.                 |              | Ref.                   |              |
| <b>Age × Immigration status</b>         |                      |              |                        |              |
| 16 – 29 × born outside Canada           | 4.64 (0.08 – 261.59) | 0.455        | 48.13 (0.83 – 2776.42) | 0.061        |
| 30 – 49 × born outside Canada           | 1.17 (0.28 – 4.89)   | 0.823        | 0.42 (0.08 – 2.03)     | 0.281        |
| <b>Income × immigration status</b>      |                      |              |                        |              |
| <\$20K × born outside Canada            | 4.56 (0.14 – 140.29) | 0.385        | 0.52 (0.00 – 45.38)    | 0.775        |
| \$20K to \$49K × born outside Canada    | 0.36 (0.06 – 1.99)   | 0.244        | 0.15 (0.01 – 1.54)     | 0.113        |
| \$50K to \$99K × born outside Canada    | 0.24 (0.05 – 1.13)   | 0.072        | 0.38 (0.04 – 3.09)     | 0.368        |
| <b>Education × immigration status</b>   |                      |              |                        |              |
| Elementary/high × born outside Canada   | 8.38 (1.60 – 43.91)  | <b>0.012</b> | 4.04 (0.63 – 25.72)    | 0.138        |
| College/technical × born outside Canada | 0.69 (0.15 – 3.16)   | 0.637        | 0.78 (0.12 – 4.86)     | 0.795        |
| <b>Age × ethnicity</b>                  |                      |              |                        |              |
| 16 – 29 × Visible minority              | 0.23 (0.00 – 7.63)   | 0.414        | 0.00 (0.00 – 0.38)     | <b>0.015</b> |
| 30 – 49 × Visible minority              | 1.88 (0.25 – 13.65)  | 0.532        | 0.35 (0.06 – 1.98)     | 0.238        |

**Table S6.** Full regression model for factors associated with mental health support seeking behavior (needed support and received, needed but no access) compared to did not need and did not access.

|                              | <b>Needed support and received</b> |                  | <b>Needed but no access</b> |                |
|------------------------------|------------------------------------|------------------|-----------------------------|----------------|
|                              | RR (95% CI)                        | <i>P-value</i>   | RR (95% CI)                 | <i>P-value</i> |
| <b>Age (years)</b>           |                                    |                  |                             |                |
| 16 – 29                      | 6.02 (2.40 – 15.13)                | <b>&lt;0.001</b> | 2.07 (0.80 – 5.32)          | 0.129          |
| 30 – 49                      | 4.21 (2.05 – 8.67)                 | <b>&lt;0.001</b> | 1.35 (0.61 – 2.99)          | 0.499          |
| Above 50                     | Ref.                               |                  | Ref.                        |                |
| <b>Gender</b>                |                                    |                  |                             |                |
| Men                          | 0.65 (0.37 – 1.13)                 | 0.133            | 0.78 (0.41 – 1.47)          | 0.449          |
| Women                        | Ref.                               |                  | Ref.                        |                |
| <b>Household composition</b> |                                    |                  |                             |                |
| Live alone                   | 2.25 (1.14 – 4.44)                 | <b>0.018</b>     | 0.85 (0.34 – 2.12)          | 0.741          |
| Live with others             | Ref.                               |                  | Ref.                        |                |
| <b>Employment status</b>     |                                    |                  |                             |                |
| Unemployed                   | 0.86 (0.39 – 1.85)                 | 0.702            | 1.83 (0.78 – 4.30)          | 0.164          |
| Retired/ Student             | 0.42 (0.17 – 1.04)                 | 0.062            | 0.67 (0.28 – 1.61)          | 0.382          |
| Employed                     | Ref.                               |                  | Ref.                        |                |
| <b>Income</b>                |                                    |                  |                             |                |
| < \$20K                      | 3.57 (1.22 – 10.43)                | <b>0.020</b>     | 1.05 (0.23 – 4.69)          | 0.947          |
| \$20K to \$49K               | 2.75 (1.19 – 6.34)                 | <b>0.018</b>     | 2.48 (1.07 – 5.74)          | <b>0.034</b>   |
| \$50K to \$99K               | 1.45 (0.71 – 2.96)                 | 0.304            | 1.15 (0.53 – 2.47)          | 0.719          |
| ≥ \$100K                     | Ref.                               |                  | Ref.                        |                |
| <b>Educational status</b>    |                                    |                  |                             |                |
| Elementary/high              | 1.13 (0.56 – 2.30)                 | 0.717            | 1.23 (0.54 – 2.79)          | 0.617          |

|                            |                    |       |                    |              |
|----------------------------|--------------------|-------|--------------------|--------------|
| College/technical          | 1.13 (0.59 – 2.17) | 0.693 | 1.47 (0.72 – 3.02) | 0.284        |
| University                 | Ref.               |       | Ref.               |              |
| <b>Physical disability</b> |                    |       |                    |              |
| Yes                        | 1.00 (0.29 – 3.41) | 0.989 | 1.26 (0.40 – 3.91) | 0.681        |
| No                         | Ref.               |       | Ref.               |              |
| <b>Immigration status</b>  |                    |       |                    |              |
| Born outside Canada        | 0.61 (0.32 – 1.14) | 0.127 | 0.14 (0.05 – 0.43) | <b>0.001</b> |
| Born inside Canada         | Ref.               |       | Ref.               |              |
| <b>Ethnicity</b>           |                    |       |                    |              |
| Visible minority           | 0.98 (0.41 – 2.29) | 0.963 | 1.01 (0.32 – 3.15) | 0.982        |
| White                      | Ref.               |       | Ref.               |              |
